# Supplementary material for: Enantiomeric pairs of copper(ii) complexes with tridentate Schiff bases derived from R- and S-methionine: the role of decorating organic groups of the ligand in crystal packing and biological activity
Source: Royal Society of Chemistry journal article supplement (doi:10.1039/d2dt02620a), 2022-01-01
Supplement: d2dt02620a1.pdf [file d2dt02620a1.pdf]

## Supporting Information

### **Enantiomeric pairs of copper(II) complexes with tridentate Schiff bases derived from *R*- and *S*-methionine: the role of decorating organic groups of the ligand in crystal packing and biological activity**

Catalin Maxim<sup>a</sup>, Cristian D. Ene<sup>\*a,b</sup>, Ioana Nicolau<sup>c</sup>, Lavinia L. Ruta<sup>c</sup>, Ileana C. Farcasanu<sup>\*c</sup>

<sup>a</sup> Department of Inorganic Chemistry, Faculty of Chemistry, University of Bucharest, Str. Dumbrova Rosie 23, 020464-Bucharest, Romania.

<sup>b</sup> "Ilie Murgulescu" Institute of Physical Chemistry of the Romanian Academy, Coordination and Supramolecular Chemistry Laboratory, Splaiul Independentei 202, 060021-Bucharest, Romania.

<sup>c</sup> Department of Organic Chemistry, Biochemistry and Catalysis, Faculty of Chemistry, University of Bucharest, Sos. Panduri 90-92, 050663-Bucharest, Romania.

\*Corresponding authors: Cristian D. Ene ([cene@icf.ro](mailto:cene@icf.ro)), Ileana C. Farcasanu ([ileana.farcasanu@chimie.unibuc.ro](mailto:ileana.farcasanu@chimie.unibuc.ro))

**Table S1.** Selected bond lengths (Å) and angles (°) for compounds **1-R·H<sub>2</sub>O**, **1-R**, **1-S**, **2-R**, and **2-S**.

| Compound                  | Distances (Å)         |           | Angles (°)                              |            |                          |            |
|---------------------------|-----------------------|-----------|-----------------------------------------|------------|--------------------------|------------|
| <b>1-R·H<sub>2</sub>O</b> | Cu1-N1                | 1.938(3)  | N1-Cu1-O1W                              | 100.55(12) | O2-Cu2-O5                | 96.51(10)  |
|                           | Cu1-O1 <sup>i</sup>   | 2.698     | N1-Cu1-O2                               | 81.24(11)  | O2-Cu2-O2                | 87.78(12)  |
|                           | Cu1-O1W               | 2.390(3)  | N1-Cu1-O5                               | 162.80(12) | O6-Cu2-N2                | 93.55(13)  |
|                           | Cu1-O2                | 2.013(2)  | O2-Cu1-O1W                              | 83.40(10)  | O6-Cu2-O5                | 170.53(11) |
|                           | Cu1-O3                | 1.907(3)  | O2-Cu1-O3                               | 172.02(11) |                          |            |
|                           | Cu1-O5 <sup>i</sup>   | 2.068(3)  | O2-Cu1-O5                               | 93.24(10)  |                          |            |
|                           | Cu2-N2                | 1.915(3)  | O3-Cu1-N1                               | 93.20(12)  |                          |            |
|                           | Cu2-O1                | 2.797     | O3-Cu1-O1W                              | 92.06(11)  |                          |            |
|                           | Cu2-O2                | 1.971(3)  | O3-Cu1-O5 <sup>i</sup>                  | 93.69(10)  |                          |            |
|                           | Cu2-O4 <sup>i</sup>   | 2.551     | O5 <sup>i</sup> -Cu1-O1W                | 94.93(11)  |                          |            |
|                           | Cu2-O5                | 2.057(3)  | N2-Cu2-O2                               | 173.99(12) |                          |            |
|                           | Cu2-O6                | 1.887(3)  | N2-Cu2-O5                               | 83.05(12)  |                          |            |
| <b>1-R</b>                | Cu1-N1                | 1.904(8)  | N1-Cu1-O2                               | 82.1(3)    | O2-Cu2-O6                | 87.5(3)    |
|                           | Cu1-O1 <sup>ii</sup>  | 2.522     | N1-Cu1-O3                               | 93.9(3)    | O5-Cu2-O6                | 168.4(2)   |
|                           | Cu1-O2                | 2.005(5)  | N1-Cu1-O5                               | 169.0(3)   |                          |            |
|                           | Cu1-O3                | 1.881(6)  | O2-Cu1-O3                               | 163.9(3)   |                          |            |
|                           | Cu1-O5 <sup>ii</sup>  | 1.990(6)  | O2-Cu1-O5                               | 95.6(2)    |                          |            |
|                           | Cu2-N2                | 1.903(7)  | O3-Cu1-O5                               | 91.1(3)    |                          |            |
|                           | Cu2-O2                | 1.973(6)  | N2-Cu2-O2                               | 175.7(3)   |                          |            |
|                           | Cu2-O4 <sup>ii</sup>  | 2.523     | N2-Cu2-O5                               | 82.3(3)    |                          |            |
|                           | Cu2-O5                | 2.028(6)  | N2-Cu2-O6                               | 94.0(3)    |                          |            |
| Cu2-O6                    | 1.877(6)              | O2-Cu2-O5 | 97.0(2)                                 |            |                          |            |
| <b>1-S</b>                | Cu1-N1                | 1.925(4)  | N1-Cu1-O2                               | 81.50(13)  | O2-Cu2-O6                | 87.72(14)  |
|                           | Cu1-O1 <sup>ii</sup>  | 2.523     | N1-Cu1-O3                               | 94.31(15)  | O5-Cu2-O6                | 168.59(13) |
|                           | Cu1-O2                | 2.012(3)  | N1-Cu1-O5                               | 168.70(15) |                          |            |
|                           | Cu1-O3                | 1.890(3)  | O2-Cu1-O3                               | 164.30(15) |                          |            |
|                           | Cu1-O5 <sup>ii</sup>  | 1.998(3)  | O2-Cu1-O5                               | 95.71(12)  |                          |            |
|                           | Cu2-N2                | 1.922(4)  | O3-Cu1-O5                               | 91.17(13)  |                          |            |
|                           | Cu2-O2                | 1.974(3)  | N2-Cu2-O2                               | 175.76(15) |                          |            |
|                           | Cu2-O4 <sup>ii</sup>  | 2.515     | N2-Cu2-O5                               | 82.3(5)    |                          |            |
|                           | Cu2-O5                | 2.028(3)  | N2-Cu2-O6                               | 93.89(15)  |                          |            |
| Cu2-O6                    | 1.889(3)              | O2-Cu2-O5 | 96.85(12)                               |            |                          |            |
| <b>2-R</b>                | Cu1-N1                | 1.949(5)  | N1-Cu1-O1 <sup>iv</sup>                 | 161.68(16) | O2-Cu1-O3                | 175.42(18) |
|                           | Cu1-O1 <sup>iv</sup>  | 2.022(4)  | N1-Cu1-O2                               | 83.20(15)  | O2-Cu1-O4 <sup>iii</sup> | 85.8(16)   |
|                           | Cu1-O2                | 1.950(4)  | N1-Cu1-O3                               | 94.33(17)  | O3-Cu1-O4                | 98.66(15)  |
|                           | Cu1-O2 <sup>iv</sup>  | 2.593     | N1-Cu1-O4                               | 104.72(17) |                          |            |
|                           | Cu1-O3                | 1.897(4)  | O1 <sup>iv</sup> -Cu1-O2                | 87.55(15)  |                          |            |
|                           | Cu1-O4 <sup>iii</sup> | 2.316(4)  | O1 <sup>iv</sup> -Cu1-O4 <sup>iii</sup> | 90.27(15)  |                          |            |
| <b>2-S</b>                | Cu1-N1                | 1.957(5)  | N1-Cu1-O1 <sup>iv</sup>                 | 161.8(2)   | O3-Cu1-O4                | 175.4(3)   |
|                           | Cu1-O1 <sup>iv</sup>  | 2.033(5)  | N1-Cu1-O2                               | 84.1(5)    | O2-Cu1-O4 <sup>iii</sup> | 85.7(2)    |
|                           | Cu1-O2                | 1.954(5)  | O3-Cu1-N1                               | 94.0(2)    | O3-Cu1-O4                | 98.7(2)    |
|                           | Cu1-O2 <sup>iv</sup>  | 2.612     | N1-Cu1-O4                               | 104.6(2)   |                          |            |
|                           | Cu1-O3                | 1.904(5)  | O1 <sup>iv</sup> -Cu1-O2                | 87.3(2)    |                          |            |
|                           | Cu1-O4 <sup>iii</sup> | 2.333(6)  | O1 <sup>iv</sup> -Cu1-O4 <sup>iii</sup> | 90.11(19)  |                          |            |

Symmetry codes: (i) -1+x, y, z; (ii) 1+x, y, z; (iii) +x, 1+y, z; (iv) -x, -0.5+y, 1-z.

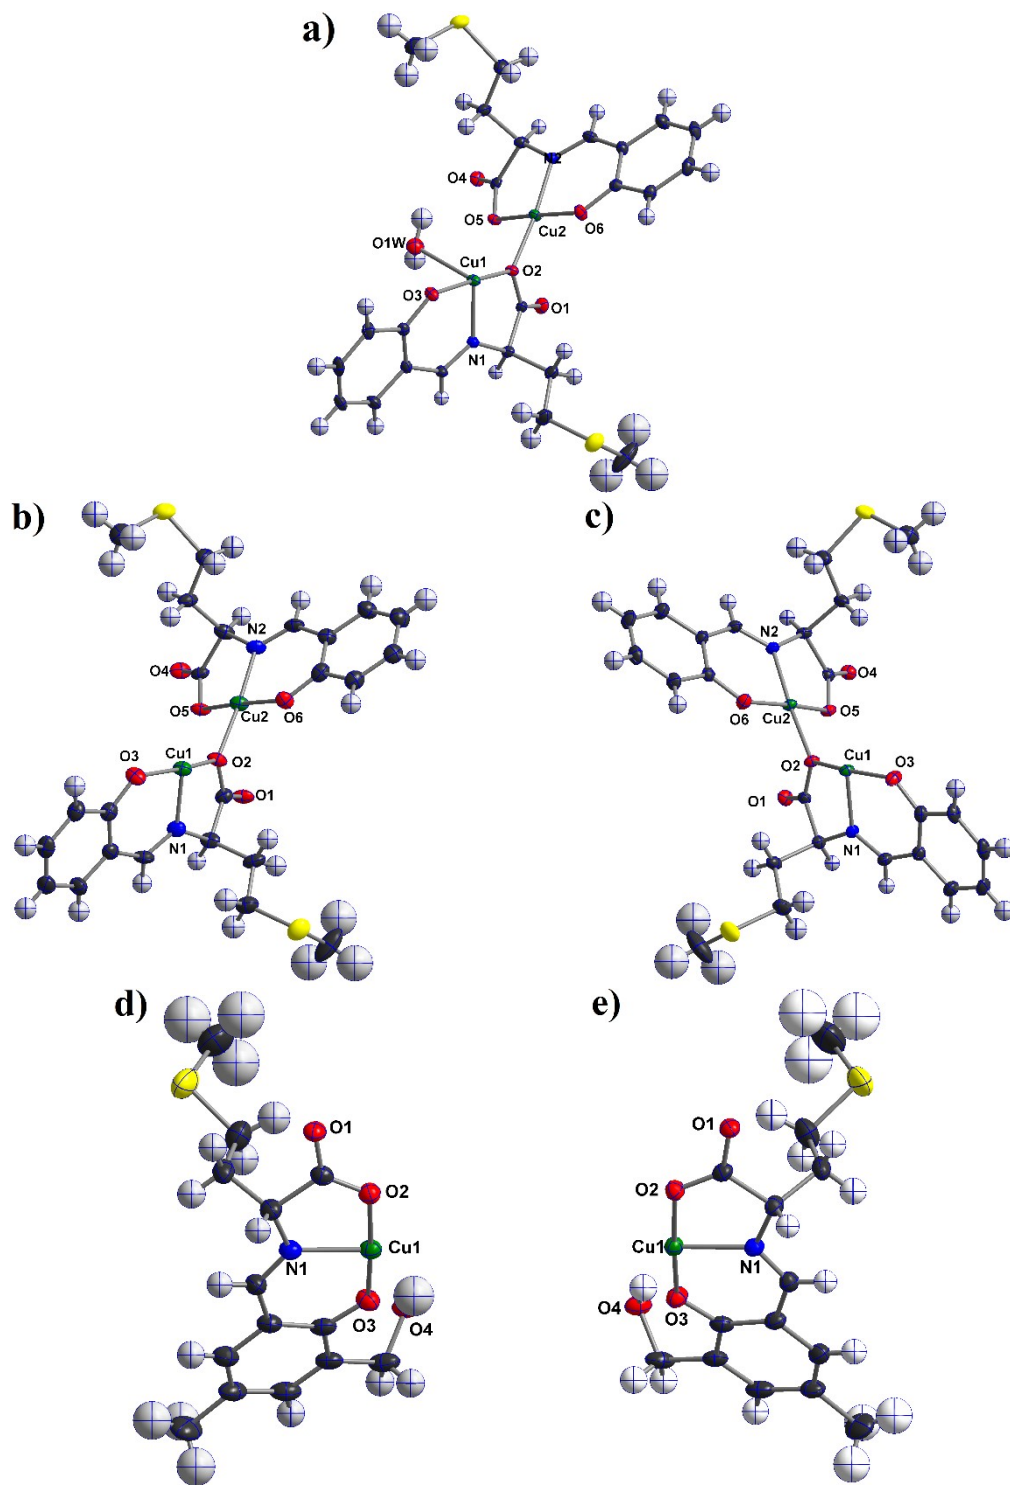

**Figure S1.** View of the asymmetric unit in  $1-R \cdot H_2O$  (a),  $1-R$  (b),  $1-S$  (c),  $2-R$  (d), and  $2-S$  (e) showing 30% probability thermal ellipsoids

**Table S2.** Continuous Shape Measures (CSHMs) for the coordination polyhedron around the Cu(II) ions.

| <b>Geometry</b> | <b>Cu1(1-R·H<sub>2</sub>O)</b> | <b>Cu2(1-R·H<sub>2</sub>O)</b> |
|-----------------|--------------------------------|--------------------------------|
| HP-6            | 32.543                         | 45.426                         |
| PPY-6           | 23.096                         | <b>34.001</b>                  |
| OC-6            | <b>2.582</b>                   | <b>34.320</b>                  |
| TPR-6           | 12.932                         | <b>33.335</b>                  |
| JPPY-6          | 25.734                         | 37.854                         |

| <b>Geometry</b> | <b>Cu1(1-R)</b> | <b>Cu2(1-R)</b> | <b>Cu1(1-S)</b> | <b>Cu2(1-S)</b> |
|-----------------|-----------------|-----------------|-----------------|-----------------|
| PP-5            | 31.024          | 30.417          | 30.895          | 30.499          |
| vOC-5           | 2.700           | 2.320           | 2.512           | 2.354           |
| TBPY-5          | 3.309           | 4.635           | 3.526           | 4.695           |
| SPY-5           | <b>2.295</b>    | <b>1.864</b>    | <b>2.155</b>    | <b>1.856</b>    |
| JTBPY-5         | 6.946           | 8.137           | 6.966           | 8.345           |

| <b>Geometry</b> | <b>Cu1(2-R)</b> | <b>Cu1(2-S)</b> |
|-----------------|-----------------|-----------------|
| HP-6            | 37.954          | 53.588          |
| PPY-6           | 21.895          | 39.224          |
| OC-6            | <b>4.612</b>    | <b>37.285</b>   |
| TPR-6           | 12.896          | 43.186          |
| JPPY-6          | 26.522          | 45.070          |

| <b>Geometry</b> | <b>Cu1(3-R)</b> | <b>Cu1(3-S)</b> |
|-----------------|-----------------|-----------------|
| PP-5            | 31.380          | 31.508          |
| vOC-5           | 2.144           | 2.027           |
| TBPY-5          | 4.314           | 4.404           |
| SPY-5           | <b>1.896</b>    | <b>1.886</b>    |
| JTBPY-5         | 7.842           | 7.657           |

PP-5\_Pentagon; vOC-5\_Vacant octahedron; TBPY-5\_Trigonal bipyramid;  
 SPY-5\_Spherical square pyramid; JTBPY-5\_Johnson trigonal bipyramid;  
 HP-6\_Hexagon; PPY-6\_Pentagonal pyramid; OC-6\_Octahedron; TPR-  
 6\_Trigonal prism; JPPY-6\_Johnson pentagonal pyramid.

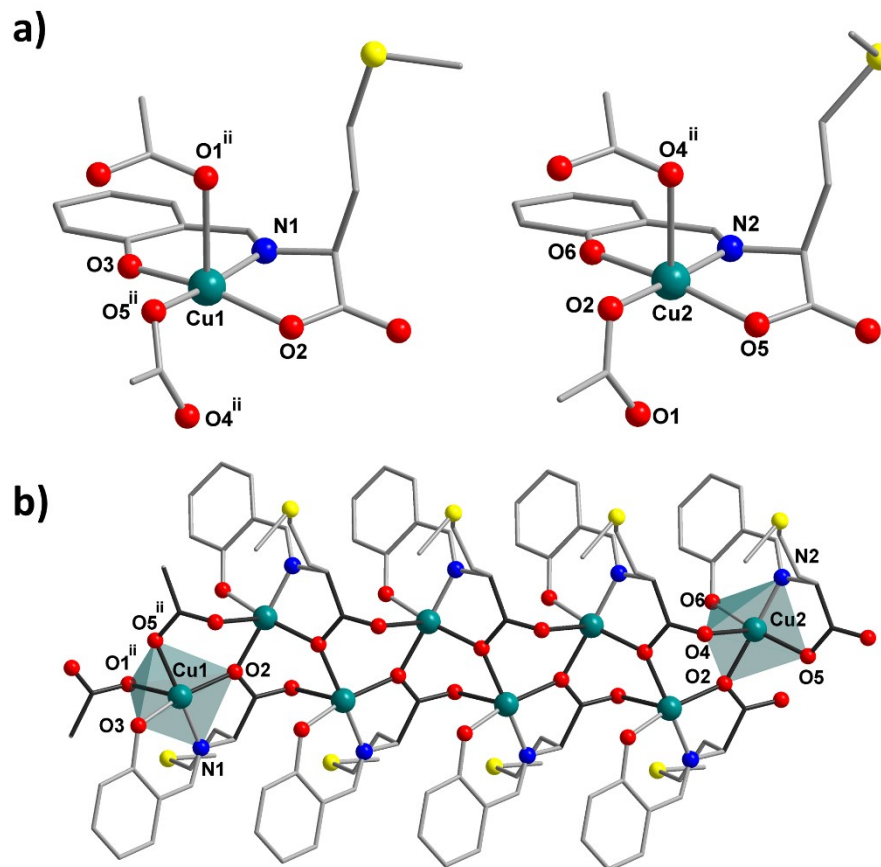

**Figure S2.** Relevant structural features determined by SC-XRD on **1-S** resulting from the single-crystal-to-single-crystal dehydration process: (a) the coordination environment of the two crystallographic independent Cu(II) ions and (b) the helical double chain motif that they construct.

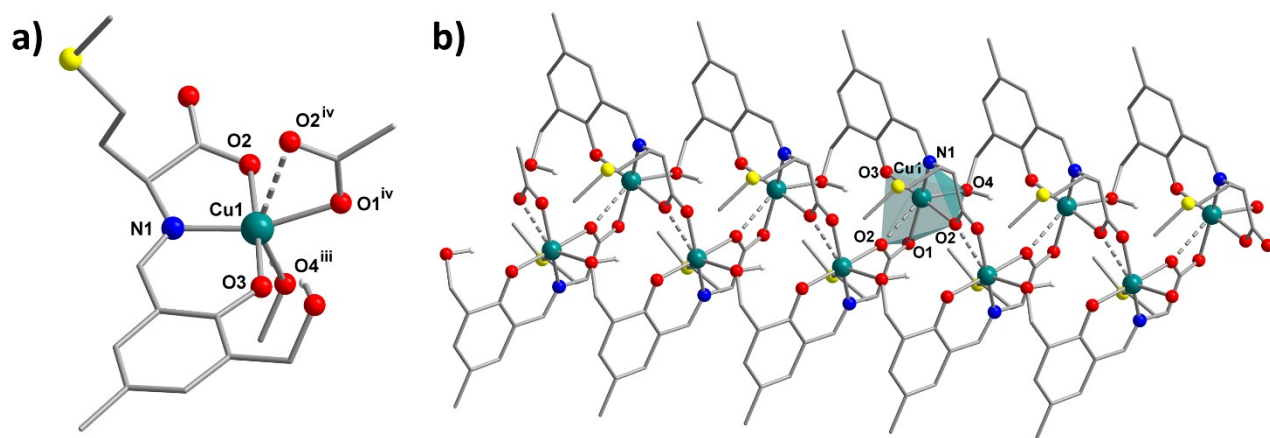

**Figure S3.** Coordination polyhedron of the copper(II) ion (a) and the resulting helical double chain (b) of **2-S**.

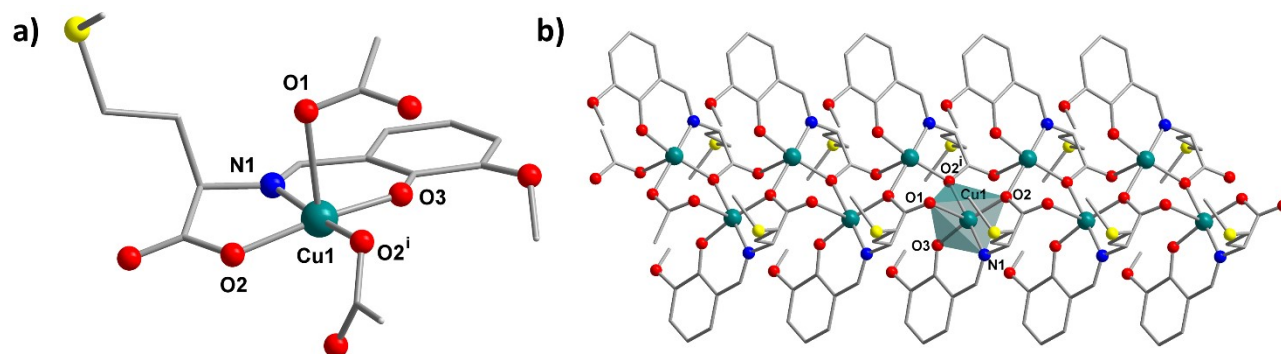

**Figure S4.** Coordination polyhedron of copper(II) ion (a) and the perspective view of a helical double chain (b) present in the crystal structure of **3-R** (for more details and full discussion, see reference C.D. Ene, C. Maxim, M. Rouzières, R. Clérac, N. Avarvari and M. Andruh, *Chem. Eur. J.*, 2018, **24**, 8569-8576).

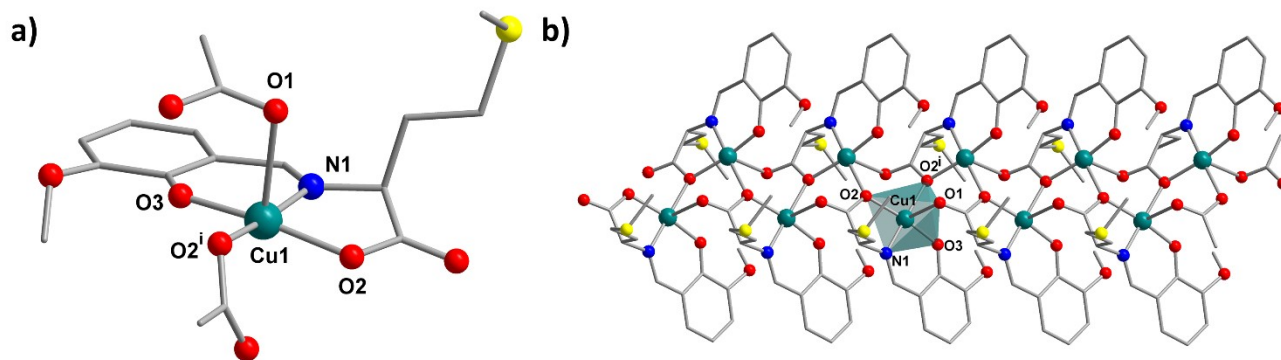

**Figure S5.** Coordination polyhedron of copper(II) ion (a) and the perspective view of a helical double chain (b) present in the crystal structure of **3-S** (for more details and full discussion, see reference C.D. Ene, C. Maxim, M. Rouzières, R. Clérac, N. Avarvari and M. Andruh, *Chem. Eur. J.*, 2018, **24**, 8569-8576).

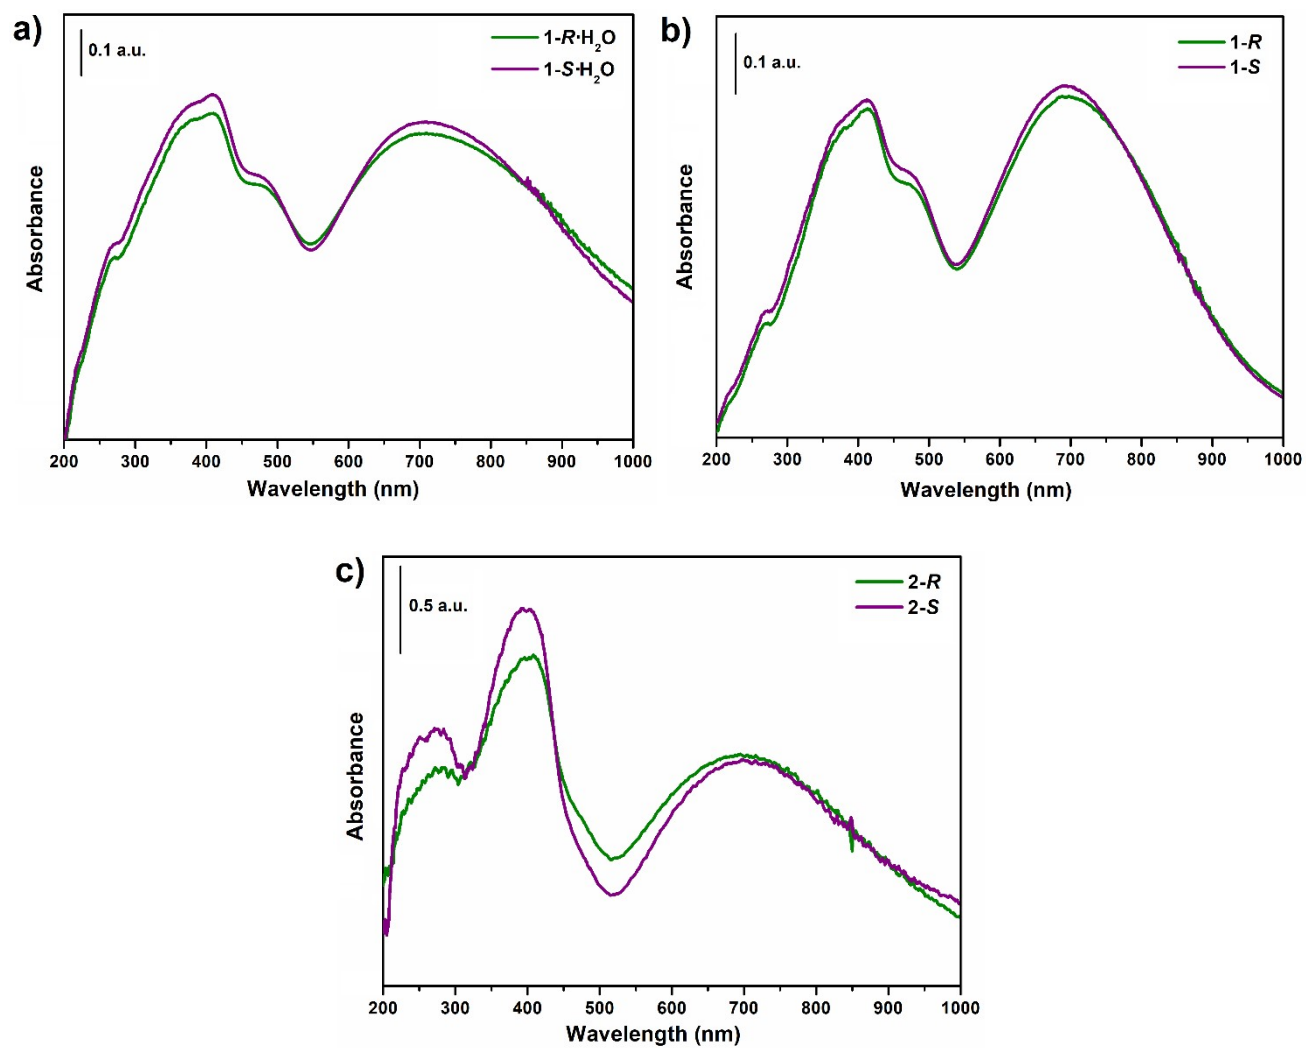

**Figure S6.** Room temperature diffuse reflectance UV-Vis spectra of the enantiomeric pairs **1-R·H<sub>2</sub>O** and **1-S·H<sub>2</sub>O** (a), **1-R** and **1-S** (b), **2-R** and **2-S** (c).

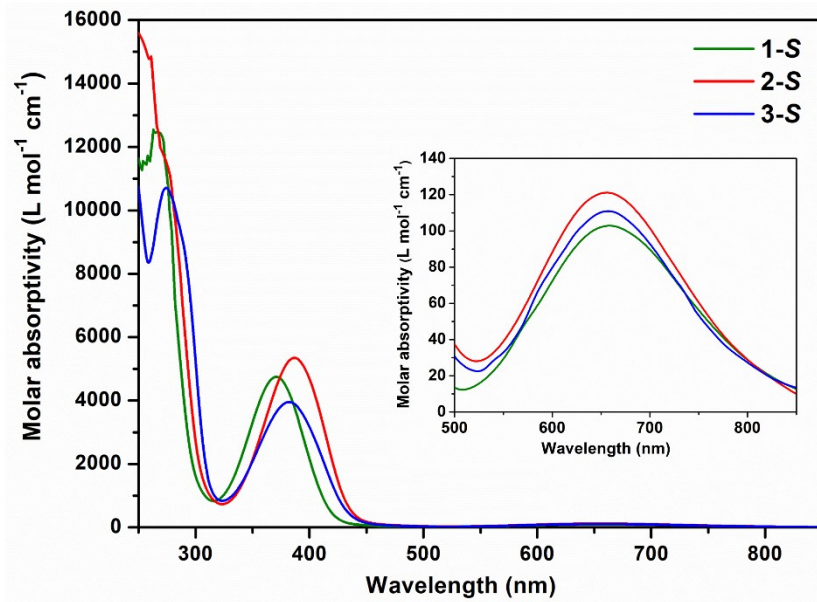

**Figure S7.** UV-Vis spectra of **1-S**, **2-S**, and **3-S** in methanol ( $c = 3.94 \times 10^{-4}$ ,  $3.46 \times 10^{-4}$ , and  $3.57 \times 10^{-4}$  mol·L<sup>-1</sup>, respectively) recorded at room temperature.



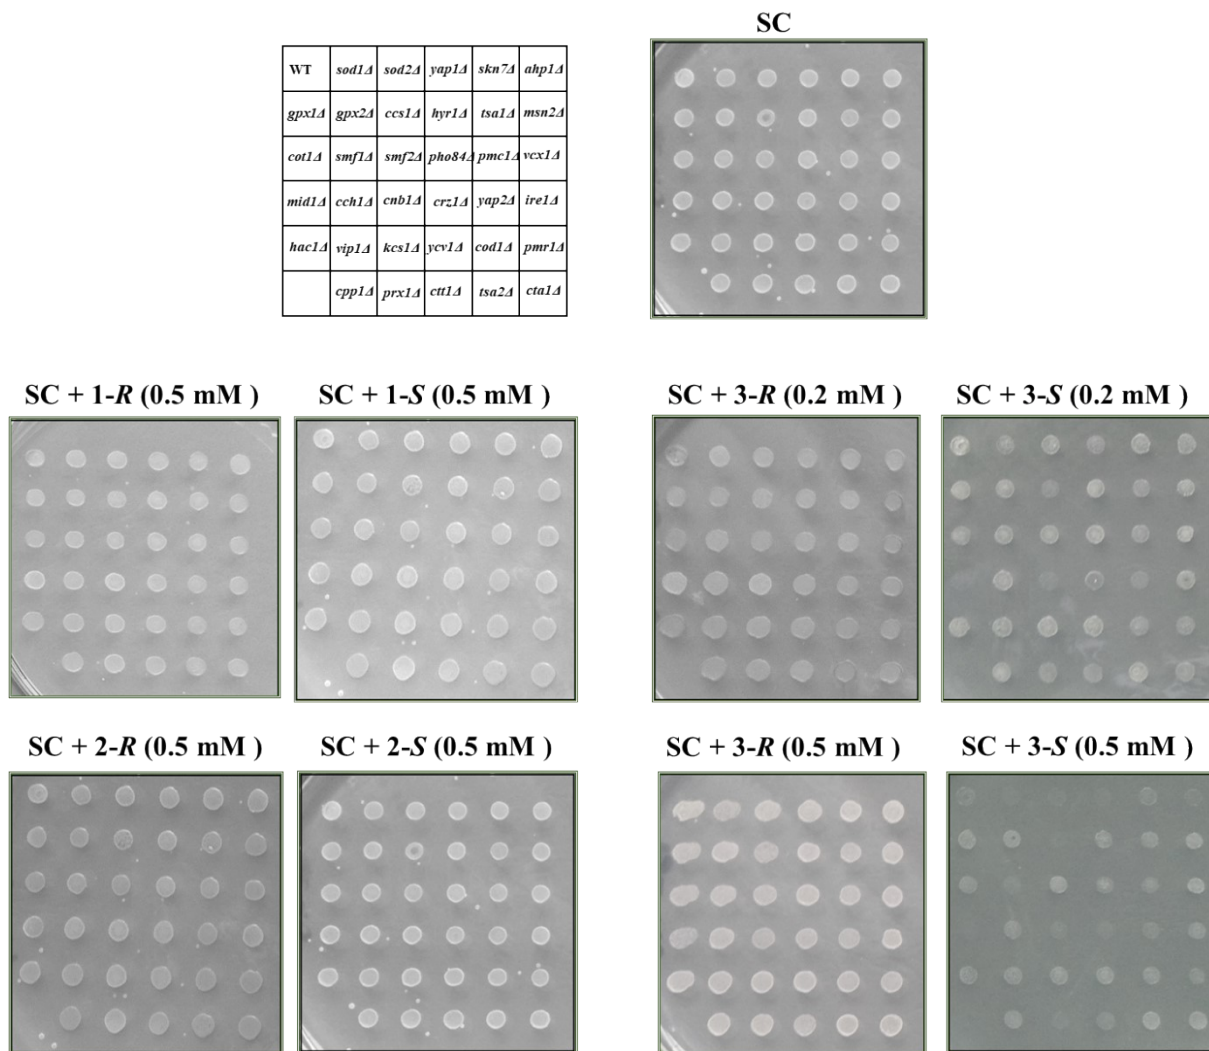

**Figure S8.** Phenotypic validation screen and confirmation of 3-S selectivity against 1-R, 1-S, 2-R, 2-S, 3-R.

Mid log growing cells ( $10^6$  cells/mL) of the specified strains grown in a 48-well plate were stamped on SC/agar by means of a pin replicator (approximately 5  $\mu$ L/spot). The agar plates were photographed after 2 days' incubation at 28 °C. Experiments were repeated three times and the results were similar. One representative set is shown.
